# Supplementary material for: Site-dependent multicomponent doping strategy for Ni-rich LiNi1−2yCoyMnyO2(y= 1/12) cathode materials for Li-ion batteries
Source: Royal Society of Chemistry journal article supplement (doi:10.1039/c7ta08618k), 2017-01-01
Supplement: c7ta08618k1.pdf [file c7ta08618k1.pdf]

Supporting Information

**Site Dependent Multicomponent Doping Strategy for Ni-rich  $\text{LiNi}_{1-2y}\text{Co}_y\text{Mn}_y\text{O}_2$   
( $y = 1/12$ ) Cathode Materials for Li-Ion Batteries**

Chaoping Liang<sup>ab</sup>, Fantai Kong<sup>b</sup>, Roberto C. Longo<sup>b</sup>, Chenxi Zhang<sup>b</sup>, Yifan Nie<sup>b</sup>,  
Yongping Zheng<sup>b</sup>, and Kyeongjae Cho<sup>\*b</sup>

<sup>a</sup> State Key Laboratory of Powder Metallurgy, Central South University, Changsha,  
Hunan 410083, China

<sup>b</sup>Materials Science & Engineering Dept., The University of Texas at Dallas,  
Richardson, TX 75080, United States

\*Corresponding Author: [kjcho@utdallas.edu](mailto:kjcho@utdallas.edu) (KJ. Cho)

Table S1. The calculated total energy used in calculating heat of formation. The total energy of Li and O are -1.898 and -4.225 eV/atom. Noted the total energy of O is obtained after adding a correction term for the O<sub>2</sub> molecule, which compensate the DFT over-delocalization of oxygen p orbitals, and improve the accuracy of the obtained heats of formation.

| Dopant | Total Energy (eV/24 formula unit<br>LiMO <sub>2</sub> ) |              |              |              | Dopant<br>oxides               | Cell Size<br>(formula<br>unit<br>M <sub>x</sub> O <sub>y</sub> ) | Total<br>Energy<br>(eV/cell) |
|--------|---------------------------------------------------------|--------------|--------------|--------------|--------------------------------|------------------------------------------------------------------|------------------------------|
|        | Co site                                                 | Li site      | Mn site      | Ni site      |                                |                                                                  |                              |
| Al     | -<br>479.301                                            | -<br>481.025 | -<br>474.345 | -<br>481.743 | Al <sub>2</sub> O <sub>3</sub> | 6                                                                | -226.48                      |
| Ga     | -<br>475.518                                            | -<br>477.443 | -<br>470.559 | -<br>478.121 | Ga <sub>2</sub> O <sub>3</sub> | 4                                                                | -121.387                     |
| Mg     | -<br>474.422                                            | -<br>476.522 | -<br>469.363 | -<br>476.823 | MgO                            | 4                                                                | -48.4143                     |
| Si     | -<br>481.878                                            | -<br>483.404 | -<br>476.882 | -<br>484.391 | SiO <sub>2</sub>               | 4                                                                | -95.6421                     |
| Ti     | -<br>484.778                                            | -<br>487.048 | -<br>479.765 | -<br>487.417 | TiO <sub>2</sub>               | 8                                                                | -213.107                     |
| V      | -<br>482.223                                            | -<br>484.512 | -<br>477.356 | -<br>484.922 | V <sub>2</sub> O <sub>5</sub>  | 4                                                                | -104.834                     |
| Zr     | -<br>484.425                                            | -<br>486.796 | -<br>479.413 | -<br>487.024 | ZrO <sub>2</sub>               | 4                                                                | -108.521                     |

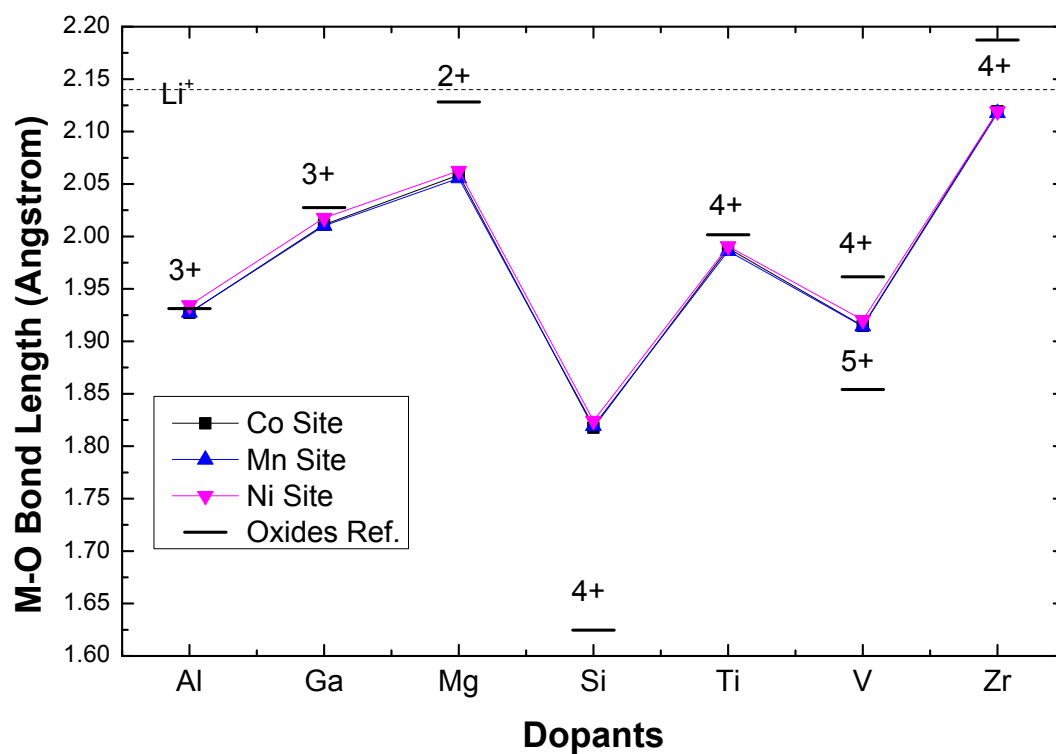

Figure S1. Dopant-O bond length for the seven dopants considered: Al, Ga, Mg, Si, Ti, V and Zr. The reference bond lengths are derived from the most stable binary oxides:  $\text{Al}_2\text{O}_3$ ,  $\text{Ga}_2\text{O}_3$ ,  $\text{MgO}$ ,  $\text{SiO}_2$ ,  $\text{TiO}_2$ ,  $\text{V}_2\text{O}_5$ ,  $\text{VO}_2$  and  $\text{ZrO}_2$ , respectively. The dotted line is the bond length of Li-O in Ni-rich NCM.

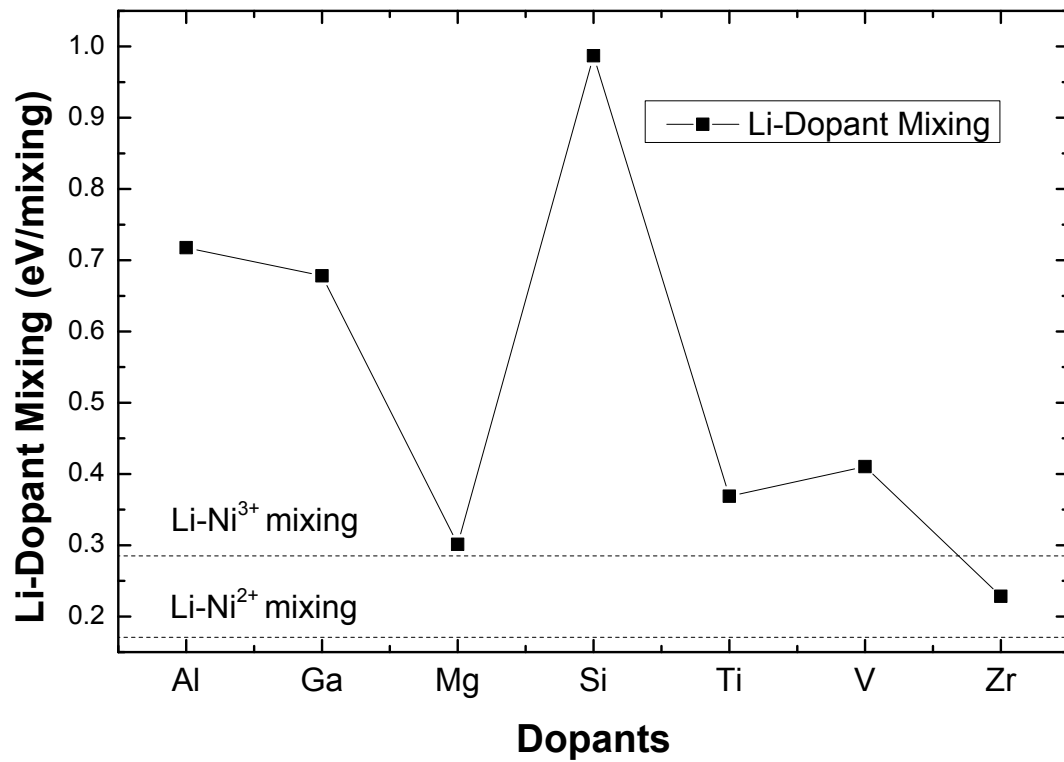

Figure S2. Formation energy of Li-dopant exchange. The energy of Li-Ni exchange in pristine Ni-rich NCM is also shown for comparison.

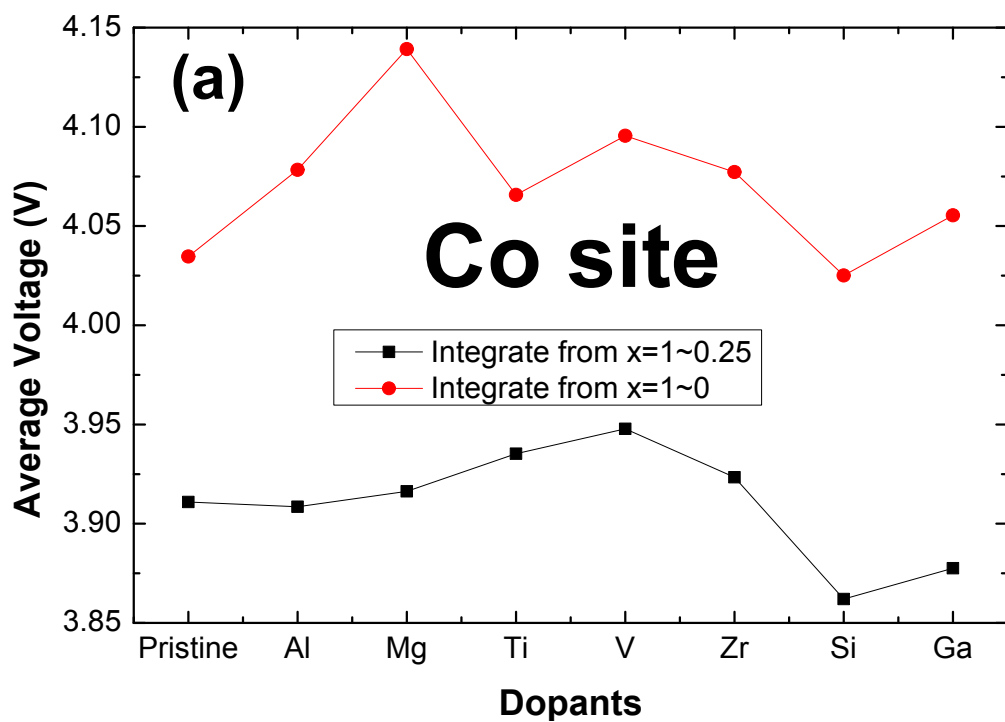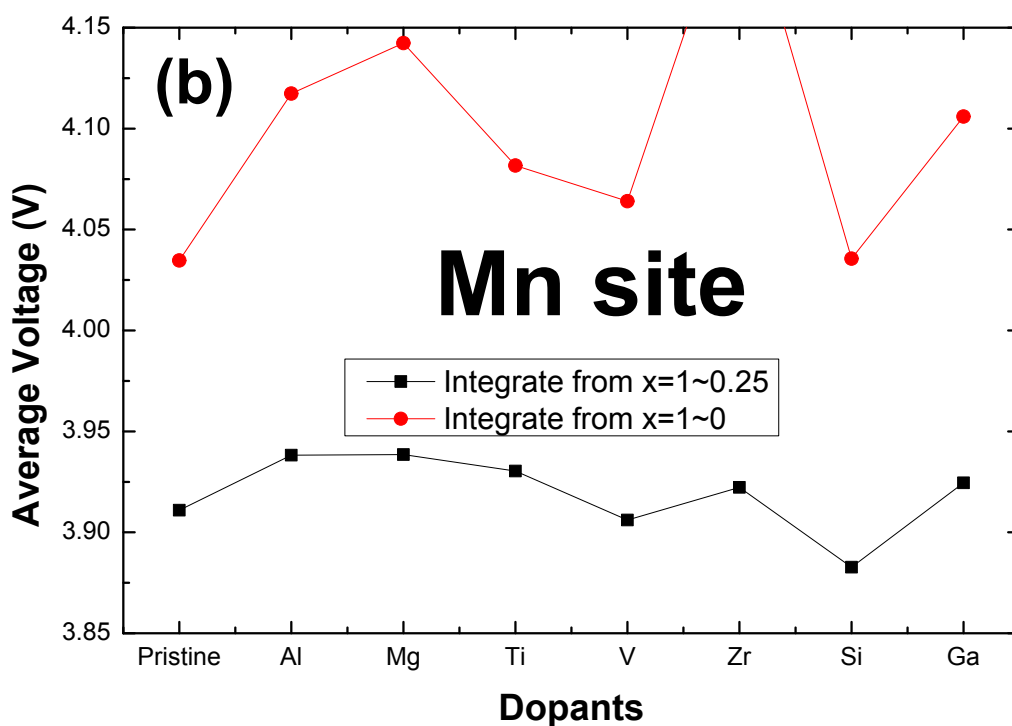

Figure S3. Calculated average voltage of NCM811 with or without dopants, (a) at Co sites, (b) at Mn sites.
